## Correction

## Correction: Inhibition of the Tcf/beta-catenin complex increases apoptosis and impairs adrenocortical tumor cell proliferation and adrenal steroidogenesis

Letícia F. Leal<sup>1</sup>, Ana Carolina Bueno<sup>1</sup>, Débora C. Gomes<sup>1,2</sup>, Rafael Abduch<sup>1</sup>, Margaret de Castro<sup>3</sup> and Sonir R. Antonini<sup>1</sup>

<sup>1</sup>Department of Pediatrics, Ribeirao Preto Medical School, University of Sao Paulo, Ribeirao Preto, Sao Paulo, Brazil

<sup>2</sup>Department of Pediatrics, School of Medicine, Federal University of Uberlandia, Uberlândia, Minas Gerais, Brazil

<sup>3</sup>Department of Internal Medicine, Ribeirao Preto Medical School, University of Sao Paulo, Ribeirao Preto, Sao Paulo, Brazil

**Published:** July 07, 2023

**Copyright:** © 2023 Leal et al. This is an open access article distributed under the terms of the [Creative Commons Attribution License](https://creativecommons.org/licenses/by/3.0/) (CCBY 3.0), which permits unrestricted use, distribution, and reproduction in any medium, provided the original author and source are credited.

**This article has been corrected:** The Grant Support information has been updated. Please see the paragraph below:

### GRANT SUPPORT

This research was supported by the Sao Paulo Research Foundation (FAPESP; LFL fellowship 2011/10512-3; Grants 2007/58365-3 and 2011/13807-4) and the National Council of Technological and Scientific Development (CNPq; Grant 474273-2013-3). This manuscript also received funding from *CAPES* - Coordination for the Improvement of Higher Education Personnel.

Original article: Oncotarget. 2015; 6:43016–43032. <https://doi.org/10.18632/oncotarget.5513>
